# Supplementary material for: How mangabey molar form differs under routine vs. fallback hard-object feeding regimes
Source: PeerJ. 2023 Dec 11;11:e16534. doi: 10.7717/peerj.16534 (PMC10720418; doi:10.7717/peerj.16534)
Supplement: DataSet S1 — Excel sheet columns by letter: A = Genus, B = Species, C = Provenience of Specimen, D = Specimen Number (from the Primatology Lab at The Ohio State University), E= Jaw, using “L” for lower and “U” for upper, F= Molar using M1 for the first molar, M2 for the second molar, and M3 for the third molar, G = Buccal Cusp Maximum Lateral Enamel Thickness, H = Lingual Cusp Maximum Lateral Enamel Thickness, I = Bicervical Diameter (BCD), J = Radius of tooth, K = PMF of lateral wall of buccal cusp (BC), L = PMF of lateral wall of lingual cusp (LC). [file peerj-11-16534-s005.xlsx]

## Sheet: Sheet1
Genus	species	Provenience	Specimen	Jaw	Molar	Max Buc lateral thickness	Max Ling lateral thickness	BCD	Radius tooth	Pmf BC lateral	Pmf LC lateral
Cercocebus	atys	Taï Forest	TF 16-5	L	M2	0.959	0.887	7.802	3.901	632.113	598.915
Cercocebus	atys	Taï Forest	TF 16-5	L	M1	0.906	0.724	7.004	3.502	557.256	477.582
Cercocebus	atys	Taï Forest	TF 24-3	L	M1	0.794	0.591	5.751	2.8755	434.277	353.944
Cercocebus	atys	Taï Forest	TF 22-26	L	M2	0.997	0.847	7.817	3.9085	650.549	581.282
Cercocebus	atys	Taï Forest	TF 22-26	L	M3	1.026	0.849	8.227	4.1135	691.423	607.301
Cercocebus	atys	Taï Forest	TF 2108	L	M3	1.171	0.879	6.313	3.1565	621.963	502.506
Cercocebus	atys	Taï Forest	TF 22-29	L	M3	1.053	0.902	7.528	3.764	656.508	588.569
Cercocebus	atys	Taï Forest	TF 2040	L	M1	0.804	0.614	5.748	2.874	438.015	363.003
Cercocebus	atys	Taï Forest	TF 2106	L	M3	1.169	0.984	6.925	3.4625	665.087	585.821
Cercocebus	atys	Taï Forest	TF 2020	L	M1	0.642	0.531	4.993	2.4965	333.994	293.009
Cercocebus	atys	Taï Forest	TF 94-9b	L	M3	1.199	0.891	7.33	3.665	707.379	571.179
Lophocebus	albigena	50 km north of Makoua	642	L	M3	1.217	0.973	6.222	3.111	634.135	535.046
Lophocebus	albigena	50 km north of Makoua	642	L	M2	1.051	0.921	6.924	3.462	614.492	558.664
Lophocebus	albigena	50 km north of Makoua	85-17	L	M2	0.974	0.837	6.238	3.119	536.501	480.694
Lophocebus	albigena	50 km north of Makoua	85-17	L	M1	0.685	0.632	5.275	2.6375	365.224	345.215
Lophocebus	albigena	50 km north of Makoua	85-7	L	M3	1.053	0.858	6.675	3.3375	598.381	516.151
Lophocebus	albigena	50 km north of Makoua	85-7	L	M1	0.876	0.65	5.839	2.9195	471.813	382.22
Lophocebus	albigena	50 km north of Makoua	85-7	L	M2	1.005	0.821	6.688	3.344	579.058	501.229
Lophocebus	albigena	50 km north of Makoua	85-1	L	M3	0.808	0.919	5.979	2.9895	453.37	497.642
Lophocebus	albigena	50 km north of Makoua	642	L	M1	0.865	0.77	4.653	2.3265	394.232	360.882
Cercopithecus	cephus	Central Congo	85-4	L	M2	0.615	0.376	3.895	1.9475	266.901	189.228
Cercopithecus	cephus	Central Congo	85-11	L	M2	0.571	0.437	4.004	2.002	258.23	214.142
Cercopithecus	cephus	Central Congo	85-11	L	M3	0.507	0.492	3.603	1.8015	218.315	213.664
Cercopithecus	cephus	Central Congo	85-13	L	M3	0.633	0.526	3.658	1.829	260.159	226.847
Cercopithecus	cephus	Central Congo	85-15	L	M1	0.607	0.457	3.939	1.9695	266.608	217.865
Cercopithecus	petaurista	Taï Forest	22-14	L	M3	0.695	0.455	3.679	1.8395	280.63	205.562
Cercopithecus	petaurista	Taï Forest	98-4	L	M3	0.682	0.46	3.824	1.912	284.519	213.67
Cercopithecus	species	Taï Forest	10_36	L	M1	0.559	0.329	3.512	1.756	229.883	158.838
Cercopithecus	petuarista	Taï Forest	22-14	L	M2	0.596	0.455	3.937	1.9685	262.951	217.119
Cercopithecus	species	Taï Forest	21-17	L	M2	0.582	0.442	4.29	2.145	276.31	228.432
Cercopithecus	species	Taï Forest	21-21	L	M2	0.582	0.453	3.993	1.9965	261.263	218.966
Cercocebus	atys	Taï Forest	TF 2041	U	M2	0.632	0.796	7.808	3.904	478.94	556.934
Cercocebus	atys	Taï Forest	TF 16-5	U	M1	0.692	0.811	8.834	4.417	564.467	625.31
Cercocebus	atys	Taï Forest	TF 2010-2	U	M2	0.829	0.915	8.921	4.4605	639.648	682.934
Cercocebus	atys	Taï Forest	TF 16-5	U	M2	1.074	1.095	9.534	4.767	803.968	814.708
Cercocebus	atys	Taï Forest	TF 2001	U	M1	0.862	0.907	8.047	4.0235	602.437	623.654
Cercocebus	atys	Taï Forest	TF 2001	U	M2	0.787	1.113	8.935	4.4675	619.11	781.934
Cercocebus	atys	Taï Forest	TF 2010-1	U	M1	0.76	0.815	7.824	3.912	540.952	566.779
Cercocebus	atys	Taï Forest	TF 2016	U	M2	0.613	0.679	7.782	3.891	468.358	500.15
Cercocebus	atys	Taï Forest	TF 2019	U	M2	0.925	1.075	8.31	4.155	648.909	720.203
Cercocebus	atys	Taï Forest	TF 2019	U	M1	0.853	0.884	7.609	3.8045	571.316	585.476
Cercocebus	atys	Taï Forest	TF 2020	U	M1	0.536	0.474	5.792	2.896	333.717	308.154
Cercocebus	atys	Taï Forest	TF 2108	U	M2	0.914	1.054	8.877	4.4385	679.64	748.927
Cercocebus	atys	Taï Forest	TF 22-46	U	M2	1.11	1.182	8.617	4.3085	758.211	792.811
Cercocebus	atys	Taï Forest	TF 22-46	U	M1	0.862	1.021	7.375	3.6875	561.005	631.895
Cercocebus	atys	Taï Forest	TF 24-3	U	M2	0.947	1.145	8.279	4.1395	657.421	751.028
Cercocebus	atys	Taï Forest	TF 24-3	U	M1	0.748	0.785	6.998	3.499	487.846	504.12
Cercocebus	atys	Taï Forest	TF 94-25	U	M2	0.818	1.113	7.691	3.8455	560.193	694.78
Cercocebus	atys	Taï Forest	TF 94-25	U	M1	0.621	0.755	7.39	3.695	451.727	513.55
Cercocebus	atys	Taï Forest	TF 94-7	U	M2	1.012	1.192	8.583	4.2915	708.602	795.143
Cercocebus	atys	Taï Forest	TP-91	U	M2	0.965	1.024	7.217	3.6085	596.708	622.608
Cercocebus	atys	Taï Forest	TF 22-26	U	M2	1.002	1.626	9.619	4.8095	772.63	1089.91
Cercocebus	atys	Taï Forest	TF 22-26	U	M3	0.949	1.064	9.223	4.6115	719.443	777.543
Cercocebus	atys	Taï Forest	TF 2010-2	U	M3	0.889	0.946	8.841	4.4205	664.896	693.244
Cercocebus	atys	Taï Forest	TF 94-9	U	M3	1.177	1.188	7.623	3.8115	718.799	723.743
Cercocebus	atys	Taï Forest	TF 94-9	U	M2	0.97	1.031	8.029	4.0145	652.014	680.429
Cercocebus	atys	Taï Forest	TF 2016	U	M3	0.938	1.088	6.829	3.4145	559.873	623.76
Cercocebus	atys	Taï Forest	TF 22-29	U	M2	0.989	1.158	9.298	4.649	744.685	829.957
Cercocebus	atys	Taï Forest	TF 22-29	U	M3	1.12	1.125	8.646	4.323	765.062	767.472
Cercocebus	atys	Taï Forest	TF 23-10	U	M3	0.833	1.383	8.066	4.033	589.853	845.939
Cercocebus	atys	Taï Forest	TF 23-10	U	M2	0.694	0.879	7.577	3.7885	495.963	581.203
Cercocebus	atys	Taï Forest	TF 2138	U	M3	1.053	1.247	8.403	4.2015	716.135	808.09
Cercocebus	atys	Taï Forest	TF 16-9	U	M3	1.084	1.2	8.693	4.3465	750.937	806.973
Cercocebus	atys	Taï Forest	TF 16-11	U	M3	0.948	1.075	7.924	3.962	634.943	693.626
Cercocebus	atys	Taï Forest	TF 2106	U	M3	1.093	1.095	7.764	3.882	690.8	691.71
Cercocebus	atys	Taï Forest	TF 2008	U	M3	0.895	1.173	7.066	3.533	556.376	676.94
Cercocebus	atys	Taï Forest	TF 2108	U	M3	1.056	1.114	7.971	3.9855	688.083	714.858
Lophocebus	albigena	50 km north of Makoua	642	U	M3	0.974	1.012	6.485	3.2425	552.689	568.445
Lophocebus	albigena	50 km north of Makoua	85-17	U	M2	0.92	0.908	7.447	3.7235	591.546	586.157
Lophocebus	albigena	50 km north of Makoua	85-17	U	M1	0.739	0.806	5.847	2.9235	418.166	444.7
Lophocebus	albigena	50 km north of Makoua	85-17	U	M3	0.969	0.93	6.724	3.362	566.238	549.731
Lophocebus	albigena	50 km north of Makoua	85-7	U	M1	0.781	0.888	6.947	3.4735	499.371	545.873
Lophocebus	albigena	50 km north of Makoua	85-7	U	M3	1.025	1.073	7.18	3.59	620.559	641.526
Lophocebus	albigena	50 km north of Makoua	85-7	U	M2	1.062	1.027	7.83	3.915	681.207	665.177
Lophocebus	albigena	50 km north of Makoua	85-1	U	M3	0.849	0.845	6.383	3.1915	494.468	492.814
Lophocebus	albigena	50 km north of Makoua	85-1	U	M2	0.822	0.745	7.374	3.687	542.957	508.074
Cercopithecus	cephus	Central Congo	85-2	U	M3	0.44	0.63	4.31	2.155	228.619	293.592
Cercopithecus	cephus	Central Congo	85-4	U	M2	0.47	0.599	4.829	2.4145	262.645	309.766
Cercopithecus	cephus	Central Congo	85-4	U	M3	0.487	0.69	4.019	2.0095	231.39	297.822
Cercopithecus	cephus	Central Congo	85-6	U	M3	0.426	0.577	3.9	1.95	205.968	254.943
Cercopithecus	cephus	Central Congo	85-11	U	M2	0.416	0.558	5.87	2.935	287.058	346.549
Cercopithecus	cephus	Central Congo	85-11	U	M3	0.45	0.584	4.084	2.042	222.026	266.533
Cercopithecus	cephus	Central Congo	85-13	U	M2	0.49	0.681	5.15	2.575	284.956	356.868
Cercopithecus	cephus	Central Congo	85-13	U	M3	0.551	0.651	3.434	1.717	223.598	253.759
Cercopithecus	cephus	Central Congo	85-15	U	M1	0.467	0.649	4.309	2.1545	237.935	299.966
Cercopithecus	petaurista	Taï Forest	22-14	U	M3	0.49	0.6	4.27	2.135	244.049	281.373
Cercopithecus	petaurista	Taï Forest	22-14	U	M2	0.546	0.601	5.175	2.5875	307.521	328.302
Cercopithecus	spp.	Taï Forest	10_36	U	M1	0.464	0.525	4.688	2.344	254.042	276.096
Cercopithecus	spp.	Taï Forest	21-12	U	M1	0.503	0.574	3.911	1.9555	231.581	254.531
Cercopithecus	spp.	Taï Forest	21-16	U	M1	0.527	0.628	5.022	2.511	292.916	330.385
Cercopithecus	spp.	Taï Forest	21-17	U	M1	0.506	0.579	4.874	2.437	278.045	304.803
Cercopithecus	spp.	Taï Forest	AnkS4	U	M1	0.405	0.567	5.13	2.565	251.034	313.229
Cercopithecus	spp.	Taï Forest	21-16	U	M2	0.616	0.815	5.281	2.6405	339.462	414.323
Cercopithecus	spp.	Taï Forest	AnkS4	U	M2	0.444	0.664	5.924	2.962	301.429	392.429
