# Supplementary material for: How mangabey molar form differs under routine vs. fallback hard-object feeding regimes
Source: PeerJ. 2023 Dec 11;11:e16534. doi: 10.7717/peerj.16534 (PMC10720418; doi:10.7717/peerj.16534)
Supplement: DataSet S2 — Excel sheet columns by letter: A = Genus; B = Species; C = Specimen Number (from the Primatology Lab at The Ohio State University); D = Normalized Distance = distance of rod center to enamel-dentin junction divided by enamel thickness (unitless); E = Reduced Modulus in GPa; F = Hardness in GPa. [file peerj-11-16534-s006.xlsx]

## Sheet: Spreadsheet S2 Nanoindentation 
Genus	Species	Specimen	Normalized Distance from EDJ	Er(GPa)	H(GPa)
Cercocebus	Atys	94-7	0	60.08	4.15
Cercocebus	Atys	94-7	0	68.2	2.88
Cercocebus	Atys	94-7	0	73.17	3.05
Cercocebus	Atys	94-7	0	74.26	2.97
Cercocebus	Atys	94-7	0	67.32	2.91
Cercocebus	Atys	94-7	0	56.3	3.33
Cercocebus	Atys	94-7	0	74.06	3.57
Cercocebus	Atys	94-7	0	76.71	3.89
Cercocebus	Atys	94-7	0	74.93	3.73
Cercocebus	Atys	94-7	0	79.55	3.84
Cercocebus	Atys	94-7	0	71.75	4.54
Cercocebus	Atys	94-7	0	73.73	3.6
Cercocebus	Atys	94-7	0	74.61	3.46
Cercocebus	Atys	94-7	0	67.07	2.99
Cercocebus	Atys	94-7	0	76.16	3.9
Cercocebus	Atys	94-7	0	69.57	4.47
Cercocebus	Atys	94-7	0	73.55	3.41
Cercocebus	Atys	94-7	0	72.76	3.46
Cercocebus	Atys	94-7	0	67.7	3.06
Cercocebus	Atys	94-7	0	64.73	2.99
Cercocebus	Atys	94-7	0	60.63	3.63
Cercocebus	Atys	94-7	0	68.13	3.2
Cercocebus	Atys	94-7	0	65.76	3.18
Cercocebus	Atys	94-7	0	58.1	2.54
Cercocebus	Atys	94-7	0	50.13	2.05
Cercocebus	Atys	94-7	0.2	56.5	3.81
Cercocebus	Atys	94-7	0.2	76.81	3.14
Cercocebus	Atys	94-7	0.2	78.95	3.36
Cercocebus	Atys	94-7	0.2	80.89	3.67
Cercocebus	Atys	94-7	0.2	78.2	2.99
Cercocebus	Atys	94-7	0.2	68.51	4.66
Cercocebus	Atys	94-7	0.2	77.98	3.22
Cercocebus	Atys	94-7	0.2	75.94	3.37
Cercocebus	Atys	94-7	0.2	84.28	3.87
Cercocebus	Atys	94-7	0.2	82.41	3.6
Cercocebus	Atys	94-7	0.2	75.9	5.1
Cercocebus	Atys	94-7	0.2	78.07	3.35
Cercocebus	Atys	94-7	0.2	71.78	3
Cercocebus	Atys	94-7	0.2	77.11	3.36
Cercocebus	Atys	94-7	0.2	85.08	3.63
Cercocebus	Atys	94-7	0.2	71.64	4.45
Cercocebus	Atys	94-7	0.2	76.65	3.52
Cercocebus	Atys	94-7	0.2	74.01	2.89
Cercocebus	Atys	94-7	0.2	79.16	3.3
Cercocebus	Atys	94-7	0.2	75.46	3.25
Cercocebus	Atys	94-7	0.2	75.94	4.62
Cercocebus	Atys	94-7	0.2	81.28	3.7
Cercocebus	Atys	94-7	0.2	73.43	3.12
Cercocebus	Atys	94-7	0.2	76.47	3.31
Cercocebus	Atys	94-7	0.2	82.23	3.35
Cercocebus	Atys	94-7	0.4	64.55	3.1
Cercocebus	Atys	94-7	0.4	81.13	3.85
Cercocebus	Atys	94-7	0.4	84.19	3.52
Cercocebus	Atys	94-7	0.4	82.92	3.44
Cercocebus	Atys	94-7	0.4	85.18	3.8
Cercocebus	Atys	94-7	0.4	73.64	4.13
Cercocebus	Atys	94-7	0.4	80.35	3.57
Cercocebus	Atys	94-7	0.4	86.52	3.84
Cercocebus	Atys	94-7	0.4	87.34	3.37
Cercocebus	Atys	94-7	0.4	76.66	2.78
Cercocebus	Atys	94-7	0.4	72.9	3.92
Cercocebus	Atys	94-7	0.4	86.16	3.92
Cercocebus	Atys	94-7	0.4	85.91	3.92
Cercocebus	Atys	94-7	0.4	85.71	3.69
Cercocebus	Atys	94-7	0.4	83.14	3.58
Cercocebus	Atys	94-7	0.4	67.02	4.78
Cercocebus	Atys	94-7	0.4	84.91	3.82
Cercocebus	Atys	94-7	0.4	88.41	3.59
Cercocebus	Atys	94-7	0.4	82.77	3.62
Cercocebus	Atys	94-7	0.4	81.1	3.26
Cercocebus	Atys	94-7	0.4	75.1	3.71
Cercocebus	Atys	94-7	0.4	79.54	3.7
Cercocebus	Atys	94-7	0.4	76.38	2.97
Cercocebus	Atys	94-7	0.4	86.98	3.67
Cercocebus	Atys	94-7	0.4	83.55	3.24
Cercocebus	Atys	94-7	0.6	68.25	1.37
Cercocebus	Atys	94-7	0.6	76.1	3.87
Cercocebus	Atys	94-7	0.6	83.57	3.69
Cercocebus	Atys	94-7	0.6	82.46	3.02
Cercocebus	Atys	94-7	0.6	82.37	3.56
Cercocebus	Atys	94-7	0.6	53.39	3.78
Cercocebus	Atys	94-7	0.6	77.46	3.14
Cercocebus	Atys	94-7	0.6	91.26	3.81
Cercocebus	Atys	94-7	0.6	94.37	4.13
Cercocebus	Atys	94-7	0.6	84.16	3.12
Cercocebus	Atys	94-7	0.6	71.39	5.44
Cercocebus	Atys	94-7	0.6	84.68	3.68
Cercocebus	Atys	94-7	0.6	89.16	3.9
Cercocebus	Atys	94-7	0.6	84.14	3.74
Cercocebus	Atys	94-7	0.6	83.88	3.28
Cercocebus	Atys	94-7	0.6	50.51	2.72
Cercocebus	Atys	94-7	0.6	87.47	3.79
Cercocebus	Atys	94-7	0.6	86.18	3.73
Cercocebus	Atys	94-7	0.6	91.94	3.9
Cercocebus	Atys	94-7	0.6	90.5	3.95
Cercocebus	Atys	94-7	0.6	77.18	5.08
Cercocebus	Atys	94-7	0.6	54.98	2.01
Cercocebus	Atys	94-7	0.6	85.1	3.26
Cercocebus	Atys	94-7	0.6	86.15	3.74
Cercocebus	Atys	94-7	0.6	86.54	3.63
Cercocebus	Atys	94-7	0.8	66.01	4.97
Cercocebus	Atys	94-7	0.8	84.02	3.9
Cercocebus	Atys	94-7	0.8	87.74	3.96
Cercocebus	Atys	94-7	0.8	87.6	3.62
Cercocebus	Atys	94-7	0.8	94.58	4.41
Cercocebus	Atys	94-7	0.8	82.5	5.54
Cercocebus	Atys	94-7	0.8	91.18	4.21
Cercocebus	Atys	94-7	0.8	93.32	4.28
Cercocebus	Atys	94-7	0.8	92.16	3.78
Cercocebus	Atys	94-7	0.8	91.37	3.39
Cercocebus	Atys	94-7	0.8	85.42	4.94
Cercocebus	Atys	94-7	0.8	90.92	3.98
Cercocebus	Atys	94-7	0.8	89.07	4.04
Cercocebus	Atys	94-7	0.8	94.15	3.96
Cercocebus	Atys	94-7	0.8	90.66	3.62
Cercocebus	Atys	94-7	0.8	83.91	5.66
Cercocebus	Atys	94-7	0.8	91.63	4.16
Cercocebus	Atys	94-7	0.8	93.5	4.3
Cercocebus	Atys	94-7	0.8	85.26	3.38
Cercocebus	Atys	94-7	0.8	91.48	3.98
Cercocebus	Atys	94-7	0.8	85.08	5.17
Cercocebus	Atys	94-7	0.8	91.29	3.86
Cercocebus	Atys	94-7	0.8	88.25	3.68
Cercocebus	Atys	94-7	0.8	86.74	3.41
Cercocebus	Atys	94-7	0.8	86.36	3.39
Cercocebus	Atys	94-7	1	68.5	4.14
Cercocebus	Atys	94-7	1	92.29	4.65
Cercocebus	Atys	94-7	1	90.23	4.2
Cercocebus	Atys	94-7	1	100.54	4.24
Cercocebus	Atys	94-7	1	86.72	3.74
Cercocebus	Atys	94-7	1	86.39	4.97
Cercocebus	Atys	94-7	1	98.62	4.53
Cercocebus	Atys	94-7	1	102.94	4.47
Cercocebus	Atys	94-7	1	94.34	3.86
Cercocebus	Atys	94-7	1	100.93	3.9
Cercocebus	Atys	94-7	1	85.56	5.66
Cercocebus	Atys	94-7	1	95.8	4.5
Cercocebus	Atys	94-7	1	94.33	4.1
Cercocebus	Atys	94-7	1	102.57	4.78
Cercocebus	Atys	94-7	1	97.85	4.11
Cercocebus	Atys	94-7	1	85.38	5
Cercocebus	Atys	94-7	1	98.96	4.73
Cercocebus	Atys	94-7	1	100.87	4.38
Cercocebus	Atys	94-7	1	94.58	3.83
Cercocebus	Atys	94-7	1	96.99	3.92
Cercocebus	Atys	94-7	1	92.62	5.65
Cercocebus	Atys	94-7	1	94.59	3.99
Cercocebus	Atys	94-7	1	90.7	3.87
Cercocebus	Atys	94-7	1	89.51	3.95
Cercocebus	Atys	94-7	1	87.62	3.74
Lophocebus	Albigena	85-7	0	60.67	3.93
Lophocebus	Albigena	85-7	0	69.59	2.5
Lophocebus	Albigena	85-7	0	72.69	2.83
Lophocebus	Albigena	85-7	0	72.29	2.62
Lophocebus	Albigena	85-7	0	80.58	3.05
Lophocebus	Albigena	85-7	0	74.9	6.28
Lophocebus	Albigena	85-7	0	82.43	3.17
Lophocebus	Albigena	85-7	0	76.03	2.71
Lophocebus	Albigena	85-7	0	70.44	2.45
Lophocebus	Albigena	85-7	0	74.61	2.78
Lophocebus	Albigena	85-7	0	71.36	4.08
Lophocebus	Albigena	85-7	0	77.8	2.86
Lophocebus	Albigena	85-7	0	80.58	3.62
Lophocebus	Albigena	85-7	0	78.45	3.05
Lophocebus	Albigena	85-7	0	77.23	3.32
Lophocebus	Albigena	85-7	0	62.13	2.98
Lophocebus	Albigena	85-7	0	74.42	2.55
Lophocebus	Albigena	85-7	0	78.29	3.22
Lophocebus	Albigena	85-7	0	74.74	2.69
Lophocebus	Albigena	85-7	0	73.67	3.2
Lophocebus	Albigena	85-7	0	84.54	5.95
Lophocebus	Albigena	85-7	0	76.64	3.27
Lophocebus	Albigena	85-7	0	71.68	3
Lophocebus	Albigena	85-7	0	72.73	2.53
Lophocebus	Albigena	85-7	0	65.98	2.73
Lophocebus	Albigena	85-7	0.2	56.77	3.09
Lophocebus	Albigena	85-7	0.2	74.14	2.91
Lophocebus	Albigena	85-7	0.2	76.83	2.62
Lophocebus	Albigena	85-7	0.2	83.22	2.94
Lophocebus	Albigena	85-7	0.2	63.28	2.95
Lophocebus	Albigena	85-7	0.2	80.01	2.91
Lophocebus	Albigena	85-7	0.2	80.32	3.03
Lophocebus	Albigena	85-7	0.2	75.83	2.52
Lophocebus	Albigena	85-7	0.2	83.25	2.96
Lophocebus	Albigena	85-7	0.2	68.98	3.5
Lophocebus	Albigena	85-7	0.2	86.49	3.66
Lophocebus	Albigena	85-7	0.2	88.59	3.75
Lophocebus	Albigena	85-7	0.2	75.77	2.92
Lophocebus	Albigena	85-7	0.2	76.21	2.34
Lophocebus	Albigena	85-7	0.2	69.14	3.2
Lophocebus	Albigena	85-7	0.2	81.92	3.2
Lophocebus	Albigena	85-7	0.2	84.05	3.31
Lophocebus	Albigena	85-7	0.2	69.76	2.52
Lophocebus	Albigena	85-7	0.2	84.11	2.42
Lophocebus	Albigena	85-7	0.2	73.05	2.45
Lophocebus	Albigena	85-7	0.2	87.64	3.67
Lophocebus	Albigena	85-7	0.2	93.4	3.84
Lophocebus	Albigena	85-7	0.2	97.27	3.74
Lophocebus	Albigena	85-7	0.2	74.68	2.81
Lophocebus	Albigena	85-7	0.4	60.72	3.38
Lophocebus	Albigena	85-7	0.4	69.45	2.61
Lophocebus	Albigena	85-7	0.4	89.71	3.34
Lophocebus	Albigena	85-7	0.4	83.02	2.89
Lophocebus	Albigena	85-7	0.4	82.66	2.55
Lophocebus	Albigena	85-7	0.4	67.2	3.26
Lophocebus	Albigena	85-7	0.4	80.1	2.89
Lophocebus	Albigena	85-7	0.4	78.95	2.8
Lophocebus	Albigena	85-7	0.4	79.6	2.79
Lophocebus	Albigena	85-7	0.4	78.88	2.77
Lophocebus	Albigena	85-7	0.4	76.52	3.2
Lophocebus	Albigena	85-7	0.4	77.62	2.75
Lophocebus	Albigena	85-7	0.4	79.48	3.02
Lophocebus	Albigena	85-7	0.4	87.7	3.27
Lophocebus	Albigena	85-7	0.4	82.35	2.74
Lophocebus	Albigena	85-7	0.4	73.68	2.73
Lophocebus	Albigena	85-7	0.4	83.04	2.94
Lophocebus	Albigena	85-7	0.4	76.69	2.98
Lophocebus	Albigena	85-7	0.4	90.44	3.69
Lophocebus	Albigena	85-7	0.4	80.39	2.89
Lophocebus	Albigena	85-7	0.4	74.8	3.07
Lophocebus	Albigena	85-7	0.4	79.9	2.71
Lophocebus	Albigena	85-7	0.4	74.16	2.57
Lophocebus	Albigena	85-7	0.4	77.24	3.02
Lophocebus	Albigena	85-7	0.4	69.61	2.39
Lophocebus	Albigena	85-7	0.6	45.27	2.96
Lophocebus	Albigena	85-7	0.6	75.55	2.9
Lophocebus	Albigena	85-7	0.6	83.87	2.91
Lophocebus	Albigena	85-7	0.6	82.65	2.81
Lophocebus	Albigena	85-7	0.6	85.68	3.04
Lophocebus	Albigena	85-7	0.6	77.43	5.15
Lophocebus	Albigena	85-7	0.6	86.12	3.39
Lophocebus	Albigena	85-7	0.6	89.83	3.22
Lophocebus	Albigena	85-7	0.6	92.56	3.18
Lophocebus	Albigena	85-7	0.6	88.26	3.24
Lophocebus	Albigena	85-7	0.6	77.05	4.15
Lophocebus	Albigena	85-7	0.6	80.92	2.85
Lophocebus	Albigena	85-7	0.6	92.07	3.41
Lophocebus	Albigena	85-7	0.6	81.64	2.56
Lophocebus	Albigena	85-7	0.6	97.41	3.55
Lophocebus	Albigena	85-7	0.6	72.59	3.35
Lophocebus	Albigena	85-7	0.6	81.28	3.2
Lophocebus	Albigena	85-7	0.6	93.3	3.6
Lophocebus	Albigena	85-7	0.6	95.66	3.63
Lophocebus	Albigena	85-7	0.6	80.25	2.51
Lophocebus	Albigena	85-7	0.6	77.41	3.99
Lophocebus	Albigena	85-7	0.6	87.22	3.29
Lophocebus	Albigena	85-7	0.6	81.22	3.44
Lophocebus	Albigena	85-7	0.6	91.06	3.6
Lophocebus	Albigena	85-7	0.6	77.71	3.44
Lophocebus	Albigena	85-7	0.8	66.38	3.63
Lophocebus	Albigena	85-7	0.8	79.87	3.34
Lophocebus	Albigena	85-7	0.8	92.99	3.24
Lophocebus	Albigena	85-7	0.8	96.23	3.77
Lophocebus	Albigena	85-7	0.8	94.71	3.54
Lophocebus	Albigena	85-7	0.8	77.06	4.26
Lophocebus	Albigena	85-7	0.8	83.58	2.84
Lophocebus	Albigena	85-7	0.8	91.94	3.33
Lophocebus	Albigena	85-7	0.8	94.62	3.63
Lophocebus	Albigena	85-7	0.8	91.07	3.64
Lophocebus	Albigena	85-7	0.8	73.29	3.61
Lophocebus	Albigena	85-7	0.8	84.97	2.72
Lophocebus	Albigena	85-7	0.8	90.98	3.46
Lophocebus	Albigena	85-7	0.8	93.12	3.26
Lophocebus	Albigena	85-7	0.8	70.83	2
Lophocebus	Albigena	85-7	0.8	85.84	3.51
Lophocebus	Albigena	85-7	0.8	93.08	3.79
Lophocebus	Albigena	85-7	0.8	91.19	3.68
Lophocebus	Albigena	85-7	0.8	93.15	3.56
Lophocebus	Albigena	85-7	0.8	90.19	3.69
Lophocebus	Albigena	85-7	0.8	85.3	4.62
Lophocebus	Albigena	85-7	0.8	95.03	3.97
Lophocebus	Albigena	85-7	0.8	91.36	3.68
Lophocebus	Albigena	85-7	0.8	73.68	3.04
Lophocebus	Albigena	85-7	0.8	82.48	3.04
Lophocebus	Albigena	85-7	1	70.98	2.88
Lophocebus	Albigena	85-7	1	76.61	2.99
Lophocebus	Albigena	85-7	1	86.18	3.68
Lophocebus	Albigena	85-7	1	95.47	3.48
Lophocebus	Albigena	85-7	1	90.74	3.61
Lophocebus	Albigena	85-7	1	76.19	4.97
Lophocebus	Albigena	85-7	1	83.48	3.05
Lophocebus	Albigena	85-7	1	91.66	3.61
Lophocebus	Albigena	85-7	1	86.78	3.45
Lophocebus	Albigena	85-7	1	91.7	3.12
Lophocebus	Albigena	85-7	1	80.91	3.35
Lophocebus	Albigena	85-7	1	91.01	4.01
Lophocebus	Albigena	85-7	1	92.35	3.54
Lophocebus	Albigena	85-7	1	94.78	3.91
Lophocebus	Albigena	85-7	1	89.85	3.28
Lophocebus	Albigena	85-7	1	93.73	4.66
Lophocebus	Albigena	85-7	1	93.19	4.25
Lophocebus	Albigena	85-7	1	93.24	3.84
Lophocebus	Albigena	85-7	1	95.75	3.74
Lophocebus	Albigena	85-7	1	94.09	3.07
Lophocebus	Albigena	85-7	1	81.57	4.25
Lophocebus	Albigena	85-7	1	86.81	3.33
Lophocebus	Albigena	85-7	1	89.61	3.22
Lophocebus	Albigena	85-7	1	98.59	3.65
Lophocebus	Albigena	85-7	1	78.76	2.51
Cercopithecus	Cephus	85-4	0	64.13	3.84
Cercopithecus	Cephus	85-4	0	66.41	2.61
Cercopithecus	Cephus	85-4	0	80.62	2.86
Cercopithecus	Cephus	85-4	0	86.81	3.31
Cercopithecus	Cephus	85-4	0	77.92	2.55
Cercopithecus	Cephus	85-4	0	70.98	3.62
Cercopithecus	Cephus	85-4	0	83	3.34
Cercopithecus	Cephus	85-4	0	83.9	3.13
Cercopithecus	Cephus	85-4	0	83.63	2.98
Cercopithecus	Cephus	85-4	0	80.41	3.42
Cercopithecus	Cephus	85-4	0	74.83	3.98
Cercopithecus	Cephus	85-4	0	85.17	3.45
Cercopithecus	Cephus	85-4	0	75.57	2.78
Cercopithecus	Cephus	85-4	0	81.04	3.25
Cercopithecus	Cephus	85-4	0	74.02	2.83
Cercopithecus	Cephus	85-4	0	77.24	4.07
Cercopithecus	Cephus	85-4	0	78.88	3.11
Cercopithecus	Cephus	85-4	0	79.13	3
Cercopithecus	Cephus	85-4	0	79.23	3.07
Cercopithecus	Cephus	85-4	0	74.46	2.98
Cercopithecus	Cephus	85-4	0	77.42	4.56
Cercopithecus	Cephus	85-4	0	80.36	3.3
Cercopithecus	Cephus	85-4	0	80.11	3.43
Cercopithecus	Cephus	85-4	0	74.84	2.91
Cercopithecus	Cephus	85-4	0	71.19	2.55
Cercopithecus	Cephus	85-4	0.2	57.63	3
Cercopithecus	Cephus	85-4	0.2	74.1	2.74
Cercopithecus	Cephus	85-4	0.2	83.22	2.94
Cercopithecus	Cephus	85-4	0.2	82.71	3.3
Cercopithecus	Cephus	85-4	0.2	74.76	2.27
Cercopithecus	Cephus	85-4	0.2	67.66	3.48
Cercopithecus	Cephus	85-4	0.2	77.51	3.43
Cercopithecus	Cephus	85-4	0.2	79.4	3.18
Cercopithecus	Cephus	85-4	0.2	77.84	2.92
Cercopithecus	Cephus	85-4	0.2	83.72	2.96
Cercopithecus	Cephus	85-4	0.2	80.71	3.64
Cercopithecus	Cephus	85-4	0.2	81.58	3.14
Cercopithecus	Cephus	85-4	0.2	84.66	3.35
Cercopithecus	Cephus	85-4	0.2	81.71	3.06
Cercopithecus	Cephus	85-4	0.2	84.09	2.89
Cercopithecus	Cephus	85-4	0.2	70.37	4.14
Cercopithecus	Cephus	85-4	0.2	75.73	2.91
Cercopithecus	Cephus	85-4	0.2	77.49	2.86
Cercopithecus	Cephus	85-4	0.2	85.97	3.35
Cercopithecus	Cephus	85-4	0.2	78.33	3.31
Cercopithecus	Cephus	85-4	0.2	72.32	3.74
Cercopithecus	Cephus	85-4	0.2	80.24	3.63
Cercopithecus	Cephus	85-4	0.2	76.76	2.96
Cercopithecus	Cephus	85-4	0.2	72.09	2.68
Cercopithecus	Cephus	85-4	0.2	80.13	2.97
Cercopithecus	Cephus	85-4	0.4	66.4	2.83
Cercopithecus	Cephus	85-4	0.4	79.69	2.6
Cercopithecus	Cephus	85-4	0.4	83.55	3.17
Cercopithecus	Cephus	85-4	0.4	71.96	2.4
Cercopithecus	Cephus	85-4	0.4	81.46	2.37
Cercopithecus	Cephus	85-4	0.4	67.94	3.28
Cercopithecus	Cephus	85-4	0.4	74.36	2.66
Cercopithecus	Cephus	85-4	0.4	79.18	2.91
Cercopithecus	Cephus	85-4	0.4	85.99	3.12
Cercopithecus	Cephus	85-4	0.4	82.09	2.74
Cercopithecus	Cephus	85-4	0.4	73.29	3.9
Cercopithecus	Cephus	85-4	0.4	81.86	3.29
Cercopithecus	Cephus	85-4	0.4	74.45	2.53
Cercopithecus	Cephus	85-4	0.4	80.66	3.59
Cercopithecus	Cephus	85-4	0.4	77.78	2.41
Cercopithecus	Cephus	85-4	0.4	70.4	3.05
Cercopithecus	Cephus	85-4	0.4	69.44	2.44
Cercopithecus	Cephus	85-4	0.4	91.51	3.93
Cercopithecus	Cephus	85-4	0.4	83.72	2.83
Cercopithecus	Cephus	85-4	0.4	80.54	2.91
Cercopithecus	Cephus	85-4	0.4	61.15	2.96
Cercopithecus	Cephus	85-4	0.4	81.18	2.99
Cercopithecus	Cephus	85-4	0.4	70.55	2.65
Cercopithecus	Cephus	85-4	0.4	74.72	3.15
Cercopithecus	Cephus	85-4	0.4	79.95	2.93
Cercopithecus	Cephus	85-4	0.6	60.98	3.61
Cercopithecus	Cephus	85-4	0.6	76.9	2.55
Cercopithecus	Cephus	85-4	0.6	75.02	2.63
Cercopithecus	Cephus	85-4	0.6	89.46	3.44
Cercopithecus	Cephus	85-4	0.6	95.62	3.68
Cercopithecus	Cephus	85-4	0.6	76.43	3.97
Cercopithecus	Cephus	85-4	0.6	83.49	3.29
Cercopithecus	Cephus	85-4	0.6	83.17	3.28
Cercopithecus	Cephus	85-4	0.6	80.27	2.87
Cercopithecus	Cephus	85-4	0.6	85.19	2.81
Cercopithecus	Cephus	85-4	0.6	77.62	3.59
Cercopithecus	Cephus	85-4	0.6	71.16	2.59
Cercopithecus	Cephus	85-4	0.6	83.88	3.42
Cercopithecus	Cephus	85-4	0.6	89.79	3.69
Cercopithecus	Cephus	85-4	0.6	79.35	2.89
Cercopithecus	Cephus	85-4	0.6	72.71	3.6
Cercopithecus	Cephus	85-4	0.6	84.66	3.37
Cercopithecus	Cephus	85-4	0.6	83.85	3.59
Cercopithecus	Cephus	85-4	0.6	83.8	3.12
Cercopithecus	Cephus	85-4	0.6	83.35	2.91
Cercopithecus	Cephus	85-4	0.6	71.54	3.86
Cercopithecus	Cephus	85-4	0.6	73.19	2.78
Cercopithecus	Cephus	85-4	0.6	84.63	3.35
Cercopithecus	Cephus	85-4	0.6	84.15	3.14
Cercopithecus	Cephus	85-4	0.6	81.02	3.01
Cercopithecus	Cephus	85-4	0.8	69.62	3.73
Cercopithecus	Cephus	85-4	0.8	76.23	2.56
Cercopithecus	Cephus	85-4	0.8	80.4	3.04
Cercopithecus	Cephus	85-4	0.8	87.55	3.04
Cercopithecus	Cephus	85-4	0.8	85.24	2.81
Cercopithecus	Cephus	85-4	0.8	75.87	3.63
Cercopithecus	Cephus	85-4	0.8	101.33	4.31
Cercopithecus	Cephus	85-4	0.8	78.51	2.92
Cercopithecus	Cephus	85-4	0.8	89.48	3.46
Cercopithecus	Cephus	85-4	0.8	83.94	2.75
Cercopithecus	Cephus	85-4	0.8	76.81	2.91
Cercopithecus	Cephus	85-4	0.8	76.55	2.84
Cercopithecus	Cephus	85-4	0.8	79.26	2.87
Cercopithecus	Cephus	85-4	0.8	84.1	3.52
Cercopithecus	Cephus	85-4	0.8	89.56	3.4
Cercopithecus	Cephus	85-4	0.8	83.61	4.79
Cercopithecus	Cephus	85-4	0.8	82.32	3.29
Cercopithecus	Cephus	85-4	0.8	78.91	2.87
Cercopithecus	Cephus	85-4	0.8	87.28	3.37
Cercopithecus	Cephus	85-4	0.8	94.68	3.76
Cercopithecus	Cephus	85-4	0.8	80.69	3.57
Cercopithecus	Cephus	85-4	0.8	78.78	3.32
Cercopithecus	Cephus	85-4	0.8	82.9	3.21
Cercopithecus	Cephus	85-4	0.8	82.92	2.93
Cercopithecus	Cephus	85-4	0.8	80.5	3.28
Cercopithecus	Cephus	85-4	1	77.04	3.35
Cercopithecus	Cephus	85-4	1	86.01	2.8
Cercopithecus	Cephus	85-4	1	88.46	3.25
Cercopithecus	Cephus	85-4	1	91.12	3.16
Cercopithecus	Cephus	85-4	1	80.19	2.2
Cercopithecus	Cephus	85-4	1	87.9	3.83
Cercopithecus	Cephus	85-4	1	84.5	3.23
Cercopithecus	Cephus	85-4	1	99.28	4.34
Cercopithecus	Cephus	85-4	1	83.55	3.07
Cercopithecus	Cephus	85-4	1	86.26	3.04
Cercopithecus	Cephus	85-4	1	71.69	3.81
Cercopithecus	Cephus	85-4	1	68.66	2.19
Cercopithecus	Cephus	85-4	1	75.27	2.37
Cercopithecus	Cephus	85-4	1	101.98	4.34
Cercopithecus	Cephus	85-4	1	77.89	2.65
Cercopithecus	Cephus	85-4	1	85.41	4.24
Cercopithecus	Cephus	85-4	1	85.68	3.58
Cercopithecus	Cephus	85-4	1	82.77	2.95
Cercopithecus	Cephus	85-4	1	77.92	2.98
Cercopithecus	Cephus	85-4	1	83.25	3.21
Cercopithecus	Cephus	85-4	1	84.4	4.51
Cercopithecus	Cephus	85-4	1	90.95	3.44
Cercopithecus	Cephus	85-4	1	92.39	3.64
Cercopithecus	Cephus	85-4	1	86.31	3.29
Cercopithecus	Cephus	85-4	1	82.68	3.06
