# Supplementary material for: How mangabey molar form differs under routine vs. fallback hard-object feeding regimes
Source: PeerJ. 2023 Dec 11;11:e16534. doi: 10.7717/peerj.16534 (PMC10720418; doi:10.7717/peerj.16534)
Supplement: DataSet S3 — Excel sheet columns by letter: A = Genus; B = Species; C = Specimen Number (from the Primatology Lab at The Ohio State University); D = Rod Number as shown in figures S6-S8; E = Fit Ellipse Major Diameter in µm; F = Fit Ellipse Minor Diameter in µm; G = Angle of Fit Ellipse Major axis relative to horizontal axis of image; H, I = X, Y coordinates in µm of rod center, origin is the top left corner of the image (Figures S6, S7, or S8); J = Distance of rod center to enamel-dentin junction in µm; K = Normalized Distance = distance of rod center to enamel-dentin junction divided by enamel thickness (unitless); L = Out-of-plane Angle in degrees computed using the Major and Minor fit ellipse diameters as described by Equation S2; M = In-plane Angle in degrees as the angle between the fit ellipse major axis and a line extending normal to the enamel-dentin junction. [file peerj-11-16534-s007.xlsx]

## Sheet: Spreadsheet S3 - Decussation me
Genus	Species	Specimen	Rod ID	FE Major (µm)	FE Minor (µm)	FE Angle	X (µm)	Y (µm)	Distance to EDJ (µm)	Normalized Distance to EDJ	Out-of-plane Angle (°)	In-plane Angle (°)
Cercocebus	Atys	94-7	1	18.15	4.17	59.46	116.26	439.75	119.361	0.235426	13.2825	-30.5373
Cercocebus	Atys	94-7	2	19.85	3.99	31.32	153.46	488.5	70.6126	0.139275	11.5959	-58.6773
Cercocebus	Atys	94-7	3	8.34	3.67	45.11	206.5	495.15	63.9651	0.126164	26.1069	-44.8873
Cercocebus	Atys	94-7	4	9.06	3.45	80.33	303.05	480.21	78.9097	0.15564	22.3829	-9.6673
Cercocebus	Atys	94-7	5	7.54	3.45	100.48	303.72	488.98	70.1397	0.138343	27.2297	10.4827
Cercocebus	Atys	94-7	6	9.88	2.55	71.45	284.4	471.76	87.3588	0.172305	14.9572	-18.5473
Cercocebus	Atys	94-7	7	8.42	2.81	106.5	273.98	461.88	97.2383	0.191791	19.4953	16.5027
Cercocebus	Atys	94-7	8	14.03	2.11	62.32	164.41	455.38	103.733	0.204602	8.64965	-27.6773
Cercocebus	Atys	94-7	9	9.18	2.91	33.5	221.98	418.42	140.696	0.277507	18.4812	-56.4973
Cercocebus	Atys	94-7	10	12.09	4.33	53.12	262.51	430.37	128.748	0.25394	20.9865	-36.8773
Cercocebus	Atys	94-7	11	15.11	2.79	69.65	151.76	343.65	215.463	0.424975	10.6405	-20.3473
Cercocebus	Atys	94-7	12	14.3	3.68	68.63	157.84	343.41	215.703	0.425449	14.9124	-21.3673
Cercocebus	Atys	94-7	13	15.03	3.42	111.08	153.49	316.64	242.473	0.47825	13.1526	21.0827
Cercocebus	Atys	94-7	14	8.17	3.57	90.14	122.73	331.7	227.411	0.448543	25.9104	0.142705
Cercocebus	Atys	94-7	15	9.75	3.67	27.13	138.65	252.43	306.682	0.604895	22.1115	-62.8673
Cercocebus	Atys	94-7	16	7.76	6.49	63.16	130.48	229.1	330.012	0.65091	56.7556	-26.8373
Cercocebus	Atys	94-7	17	8.09	6.44	59.49	104.06	229.36	329.75	0.650395	52.754	-30.5073
Cercocebus	Atys	94-7	18	8.56	7.12	169.75	125.63	221.66	337.451	0.665584	56.2816	79.7527
Cercocebus	Atys	94-7	19	8.22	4.29	118.67	161.18	212.92	346.193	0.682826	31.4596	28.6727
Cercocebus	Atys	94-7	20	8.62	4.31	122.43	154.78	204.24	354.873	0.699946	30	32.4327
Cercocebus	Atys	94-7	21	9.01	7.59	80.39	174.54	227.02	332.094	0.655017	57.3941	-9.6073
Cercocebus	Atys	94-7	22	6.46	5.66	74.53	181.22	231.75	327.364	0.645688	61.1827	-15.4673
Cercocebus	Atys	94-7	23	7.49	6.21	166.81	191.29	207.37	351.744	0.693776	56.007	76.8127
Cercocebus	Atys	94-7	24	10.24	5.14	96.76	199.05	202.64	356.475	0.703106	30.1293	6.7627
Cercocebus	Atys	94-7	25	13.92	5.19	100.52	183.26	203.13	355.984	0.702138	21.8912	10.5227
Cercocebus	Atys	94-7	26	7.71	6.07	35.25	203.42	245.44	313.675	0.618688	51.9329	-54.7473
Cercocebus	Atys	94-7	27	8.09	6.62	68.76	216.76	244.67	314.446	0.620208	54.9144	-21.2373
Cercocebus	Atys	94-7	28	15.43	5.14	62.46	228.35	204.13	354.986	0.70017	19.4581	-27.5373
Cercocebus	Atys	94-7	29	9.2	5.91	107.37	158.68	224.98	334.133	0.659039	39.9704	17.3727
Cercocebus	Atys	94-7	30	12.74	4.96	106.34	134.48	197.14	361.972	0.713948	22.9125	16.3427
Cercocebus	Atys	94-7	31	22.3	4.69	85.1	108.04	171.06	388.05	0.765385	12.1407	-4.8973
Cercocebus	Atys	94-7	32	27.41	4.64	81.91	121.19	168.68	390.431	0.770081	9.74603	-8.0873
Cercocebus	Atys	94-7	33	11.25	3.8	93.21	121.73	189.48	369.631	0.729055	19.7415	3.2127
Cercocebus	Atys	94-7	34	8.27	5.22	142.07	183.47	213.73	345.384	0.681231	39.1385	52.0727
Cercocebus	Atys	94-7	35	18.51	4.37	71.51	257.82	218.68	340.438	0.671474	13.6558	-18.4873
Cercocebus	Atys	94-7	36	31.17	5.77	69	272.07	199.78	359.338	0.708754	10.6678	-20.9973
Cercocebus	Atys	94-7	37	11.03	6.47	72.07	298.33	184.72	374.399	0.73846	35.9148	-17.9273
Cercocebus	Atys	94-7	38	10.45	6.25	88.65	296.45	168.76	390.359	0.76994	36.7329	-1.3473
Cercocebus	Atys	94-7	39	13.91	3.68	45.69	202.07	285.42	273.695	0.539832	15.3407	-44.3073
Cercocebus	Atys	94-7	40	19.76	6.36	61.46	233.05	235.1	324.016	0.639085	18.7756	-28.5373
Cercocebus	Atys	94-7	41	15.03	4.49	72.14	215.35	201.94	357.176	0.704488	17.3817	-17.8573
Cercocebus	Atys	94-7	42	9.3	5.79	58.77	196.91	221.9	337.215	0.665118	38.5048	-31.2273
Cercocebus	Atys	94-7	43	9.46	4.18	97.43	95.06	195.19	363.92	0.717791	26.2226	7.4327
Cercocebus	Atys	94-7	44	11.62	4.26	95.36	96.63	314.42	244.69	0.482623	21.5067	5.3627
Cercocebus	Atys	94-7	45	11.07	4.63	87.7	90.77	306.03	253.08	0.499171	24.724	-2.2973
Cercocebus	Atys	94-7	46	22.72	4.52	124.26	132.99	290	269.112	0.530792	11.4752	34.2627
Cercocebus	Atys	94-7	47	25.99	4.5	44.31	200.21	266.67	292.445	0.576814	9.97064	-45.6873
Cercocebus	Atys	94-7	48	10.25	4.51	36.63	205.52	269.57	289.545	0.571095	26.1039	-53.3673
Cercocebus	Atys	94-7	49	6.41	5.04	64.57	183.49	244.23	314.884	0.621073	51.8384	-25.4273
Cercocebus	Atys	94-7	50	19.44	3.84	81.07	171.05	127.73	431.383	0.850855	11.3926	-8.9273
Cercocebus	Atys	94-7	51	13.22	4.11	79.99	110.77	110.3	448.811	0.885228	18.113	-10.0073
Lophocebus	Albigena	85-7	1	21.57	3.55	123.42	243.75	679.1	42.2882	0.0708885	9.47286	32.6683
Lophocebus	Albigena	85-7	2	17.27	2.54	102.59	265.15	663.88	57.2261	0.0967578	8.45751	11.8383
Lophocebus	Albigena	85-7	3	21.52	2.44	102.69	268.46	643	78.0609	0.132175	6.51036	11.9383
Lophocebus	Albigena	85-7	4	10.96	2.91	105.74	268.47	658.18	62.8821	0.106465	15.3973	14.9883
Lophocebus	Albigena	85-7	5	12.13	2.79	96.63	264.95	624.37	96.7354	0.163581	13.2976	5.87835
Lophocebus	Albigena	85-7	6	23.84	2.93	113.17	239.59	627.15	94.2883	0.15784	7.05965	22.4183
Lophocebus	Albigena	85-7	7	11.62	2.62	106.26	255.38	652.21	69.0233	0.116257	13.0307	15.5083
Lophocebus	Albigena	85-7	8	13.07	3.04	101.01	298.54	658.29	62.3776	0.106898	13.4498	10.2583
Lophocebus	Albigena	85-7	9	10.79	3.03	91.57	283.39	634.99	85.8744	0.146285	16.3089	0.818345
Lophocebus	Albigena	85-7	10	22.07	4.53	112.2	304.13	591.53	129.059	0.221752	11.8445	21.4483
Lophocebus	Albigena	85-7	11	9.64	4.01	117.54	318.77	632.26	88.14	0.152318	24.5807	26.7883
Lophocebus	Albigena	85-7	12	59.04	5.2	118.2	332.33	639.35	80.8727	0.140532	5.05292	27.4483
Lophocebus	Albigena	85-7	13	19.17	3.12	143.43	367.53	626.12	93.6398	0.165118	9.3668	52.6783
Lophocebus	Albigena	85-7	14	12.27	3.26	153.83	375.3	618.52	101.137	0.178925	15.4079	63.0783
Lophocebus	Albigena	85-7	15	10.96	2.59	153.1	356.65	615.58	104.322	0.183133	13.6691	62.3483
Lophocebus	Albigena	85-7	16	9.81	3.1	143.97	341.63	612.03	108.068	0.188538	18.4214	53.2183
Lophocebus	Albigena	85-7	17	26.63	3.27	127.56	387	607.93	111.573	0.19837	7.05337	36.8083
Lophocebus	Albigena	85-7	18	17.98	2.39	147.4	368.32	605.99	113.758	0.20068	7.63868	56.6483
Lophocebus	Albigena	85-7	19	7.66	2.99	139.84	371.34	590.89	128.817	0.227552	22.9756	49.0883
Lophocebus	Albigena	85-7	20	12.76	3.49	159.37	352.62	583.53	136.422	0.239125	15.8733	68.6183
Lophocebus	Albigena	85-7	21	24.3	2.21	94.63	399.49	570.89	148.446	0.265375	5.21806	3.87835
Lophocebus	Albigena	85-7	22	16.4	5.85	92.14	282.56	508.98	211.884	0.36106	20.8981	1.38835
Lophocebus	Albigena	85-7	23	10.88	5.52	132.17	300.34	519.07	201.562	0.345931	30.4877	41.4183
Lophocebus	Albigena	85-7	24	24.28	3.61	73.65	215.68	519.29	202.453	0.335917	8.55056	-17.1017
Lophocebus	Albigena	85-7	25	18.53	2.53	72.34	222.66	496.18	225.469	0.375179	7.84741	-18.4117
Lophocebus	Albigena	85-7	26	18.83	3.13	66.26	232.25	465.55	255.971	0.427614	9.56835	-24.4917
Lophocebus	Albigena	85-7	27	28.51	3.17	59.78	239.94	468.8	252.62	0.423296	6.38386	-30.9717
Lophocebus	Albigena	85-7	28	43.84	3.55	87.65	193.87	486.55	235.476	0.38746	4.64468	-3.10165
Lophocebus	Albigena	85-7	29	22.18	3.22	73.93	215.08	443.03	278.714	0.462525	8.34746	-16.8217
Lophocebus	Albigena	85-7	30	10.74	3.42	149.17	330.15	503.56	216.68	0.376462	18.5684	58.4183
Lophocebus	Albigena	85-7	31	10.87	3.01	152.79	335.66	501.85	218.317	0.380171	16.0758	62.0383
Lophocebus	Albigena	85-7	32	14.31	2.7	146.05	349.51	503.23	216.756	0.379614	10.8757	55.2983
Lophocebus	Albigena	85-7	33	10.62	3.56	146.35	347.91	478.66	241.345	0.422454	19.5857	55.5983
Lophocebus	Albigena	85-7	34	12.39	4.65	128.66	300.88	478.61	242.011	0.415532	22.043	37.9083
Lophocebus	Albigena	85-7	35	13.32	2.91	156.71	326.31	459.35	260.936	0.452747	12.6191	65.9583
Lophocebus	Albigena	85-7	36	13.11	3.22	143.35	337.68	458.03	262.107	0.456913	14.2181	52.5983
Lophocebus	Albigena	85-7	37	16.57	2.76	139.93	335.59	450.87	269.294	0.469056	9.58822	49.1783
Lophocebus	Albigena	85-7	38	13.74	4.27	135.85	328.94	438.4	281.85	0.489618	18.1057	45.0983
Lophocebus	Albigena	85-7	39	20.74	2.93	114.12	363.81	453.02	266.774	0.470126	8.12151	23.3683
Lophocebus	Albigena	85-7	40	7.56	3.02	137.94	347.24	439.26	280.75	0.491399	23.5451	47.1883
Lophocebus	Albigena	85-7	41	20.89	3.63	135.79	350.89	418.23	301.73	0.528981	10.0069	45.0383
Lophocebus	Albigena	85-7	42	18.81	3.27	128.08	351.02	405.44	314.517	0.551467	10.0114	37.3283
Lophocebus	Albigena	85-7	43	12.61	2.98	140.34	346.12	392.3	327.721	0.573492	13.6695	49.5883
Lophocebus	Albigena	85-7	44	11.36	3.75	153.4	335.83	385.82	334.335	0.582607	19.2752	62.6483
Lophocebus	Albigena	85-7	45	13.5	2.95	146.42	351.11	384.88	335.074	0.587598	12.622	55.6683
Lophocebus	Albigena	85-7	46	17.3	3.13	120.35	365.85	388.51	331.251	0.584455	10.4236	29.5983
Lophocebus	Albigena	85-7	47	23.83	3.95	105.03	367.49	404.67	315.071	0.556239	9.54124	14.2783
Lophocebus	Albigena	85-7	48	40.52	3.31	86.45	386.96	408.69	310.796	0.553176	4.6856	-4.30165
Lophocebus	Albigena	85-7	49	17.88	4.73	91.83	291.32	410.37	310.371	0.531037	15.3397	1.07835
Lophocebus	Albigena	85-7	50	19.82	3.99	140.5	351.95	355.17	364.771	0.640002	11.6137	49.7483
Lophocebus	Albigena	85-7	51	20.6	3.67	127.4	371	342.44	377.25	0.667216	10.2623	36.6483
Lophocebus	Albigena	85-7	52	19.22	4.7	119.72	385.73	328.19	391.305	0.69642	14.1545	28.9683
Lophocebus	Albigena	85-7	53	17.54	4.11	111.61	386.75	352.53	366.954	0.653274	13.5516	20.8583
Lophocebus	Albigena	85-7	54	10.85	3.37	142.37	336.2	359.52	360.628	0.62861	18.0953	51.6183
Lophocebus	Albigena	85-7	55	28.4	4.13	97	302.17	340.68	379.913	0.65313	8.36175	6.24835
Lophocebus	Albigena	85-7	56	8.44	4.65	104.76	328.19	332.97	387.281	0.672943	33.4321	14.0083
Lophocebus	Albigena	85-7	57	14.12	4.71	100.61	325.14	311.98	408.309	0.708674	19.4856	9.85835
Lophocebus	Albigena	85-7	58	16.96	4.89	102.27	347.05	291.25	428.75	0.750989	16.7577	11.5183
Lophocebus	Albigena	85-7	59	36.55	3.68	115.2	387.08	275.77	443.703	0.790352	5.77856	24.4483
Lophocebus	Albigena	85-7	60	19.43	3.14	108.18	367.17	248.67	471.062	0.83223	9.30011	17.4283
Lophocebus	Albigena	85-7	61	18.38	4.66	117.05	376.01	264.39	455.227	0.807167	14.6869	26.2983
Lophocebus	Albigena	85-7	62	25.18	5.04	97.02	371.32	223.93	495.746	0.877479	11.5462	6.26835
Lophocebus	Albigena	85-7	63	36.65	2.77	96.45	206.17	292.68	429.168	0.710269	4.33454	5.69835
Lophocebus	Albigena	85-7	64	45.45	2.91	90.7	214.25	269.58	452.16	0.750784	3.67095	-0.0516548
Lophocebus	Albigena	85-7	65	26.6	3.78	103.82	218.61	221.12	500.559	0.83278	8.16969	13.0683
Lophocebus	Albigena	85-7	66	20.3	3.46	103.2	220.63	193.87	527.78	0.87889	9.8136	12.4483
Lophocebus	Albigena	85-7	67	22.79	3.76	100.46	214.05	171.31	550.424	0.914337	9.49634	9.70835
Lophocebus	Albigena	85-7	68	15.58	3.91	102.7	260.61	177.64	543.484	0.919597	14.5345	11.9483
Lophocebus	Albigena	85-7	69	25.61	3.36	99.33	242.92	184.53	536.827	0.901916	7.53887	8.57835
Lophocebus	Albigena	85-7	70	59.57	3.47	81.82	317.78	273.12	447.262	0.774106	3.33942	-8.93165
Cercopithecus	Cephus	85-4	1	18.16	2.93	106.57	276.88	446.62	109.774	0.227646	9.28489	15.915
Cercopithecus	Cephus	85-4	2	7.88	2.95	114.26	302.68	426.08	130.018	0.268422	21.9851	23.605
Cercopithecus	Cephus	85-4	3	8.15	3.4	75.85	309.31	445.42	110.603	0.22809	24.6565	-14.805
Cercopithecus	Cephus	85-4	4	11.78	3.24	91.73	295.45	448.1	108.082	0.223422	15.9645	1.07503
Cercopithecus	Cephus	85-4	5	19.1	2.81	101.67	275.77	423.95	132.455	0.274722	8.46009	11.015
Cercopithecus	Cephus	85-4	6	17.49	2.76	106.57	267.68	422.8	133.698	0.277685	9.07948	15.915
Cercopithecus	Cephus	85-4	7	14.46	3	69.17	321.92	468.98	86.9006	0.178831	11.9741	-21.485
Cercopithecus	Cephus	85-4	8	15.9	3.49	114.77	343.38	411.13	144.502	0.296246	12.6795	24.115
Cercopithecus	Cephus	85-4	9	13.57	3.33	112.44	349.23	413.95	141.615	0.29004	14.2051	21.785
Cercopithecus	Cephus	85-4	10	13.8	3.65	85.06	339.05	425.69	129.992	0.266704	15.3368	-5.59497
Cercopithecus	Cephus	85-4	11	10.27	3.17	103.44	383.65	404.36	150.811	0.307069	17.9789	12.785
Cercopithecus	Cephus	85-4	12	9.73	3.5	94.1	375.67	412.71	142.553	0.290651	21.0825	3.44503
Cercopithecus	Cephus	85-4	13	12.02	3.74	121.34	372.96	399.5	155.793	0.317784	18.1284	30.685
Cercopithecus	Cephus	85-4	14	25.1	4.37	55.1	432.11	420.02	134.598	0.271835	10.0265	-35.555
Cercopithecus	Cephus	85-4	15	28.2	4.19	61.27	401.03	416.81	138.163	0.280498	8.54473	-29.385
Cercopithecus	Cephus	85-4	16	21.07	4.24	55.28	426.84	449.79	104.89	0.212037	11.6091	-35.375
Cercopithecus	Cephus	85-4	17	4.26	2.87	155.68	471.39	456	98.1712	0.196982	42.354	65.025
Cercopithecus	Cephus	85-4	18	3.74	3.12	145.03	472.99	451.47	102.683	0.205978	56.5352	54.375
Cercopithecus	Cephus	85-4	19	4.05	2.66	133.48	477.32	455.54	98.5633	0.197573	41.0555	42.825
Cercopithecus	Cephus	85-4	20	8.81	4.07	133.02	488.08	419.87	134.108	0.268324	27.5146	42.365
Cercopithecus	Cephus	85-4	21	11	3.43	93.94	487.05	436.79	117.201	0.234544	18.1688	3.28503
Cercopithecus	Cephus	85-4	22	17.5	4.49	98.9	491.31	438.58	115.362	0.230702	14.8667	8.24503
Cercopithecus	Cephus	85-4	23	12.1	4.38	82.64	524.08	410	143.566	0.285533	21.2221	-8.01497
Cercopithecus	Cephus	85-4	24	17.78	4.13	85.41	509.22	415.81	137.926	0.274995	13.4315	-5.24497
Cercopithecus	Cephus	85-4	25	8.99	4.47	104.89	518.22	373.46	180.17	0.358657	29.8162	14.235
Cercopithecus	Cephus	85-4	26	20.75	4.57	79.08	527.59	371.42	182.103	0.361942	12.7232	-11.575
Cercopithecus	Cephus	85-4	27	9.07	4.31	97.06	529.39	340.25	213.251	0.423698	28.3719	6.40503
Cercopithecus	Cephus	85-4	28	7.72	3.48	123.78	521.56	345.15	208.44	0.414681	26.7936	33.125
Cercopithecus	Cephus	85-4	29	5.05	4.1	146.15	525.42	323.52	230.025	0.457312	54.2801	55.495
Cercopithecus	Cephus	85-4	30	7.09	4.31	126.44	530.03	331.16	222.333	0.441689	37.4377	35.785
Cercopithecus	Cephus	85-4	31	9.04	4.52	128.84	533.14	317.52	235.936	0.468461	30	38.185
Cercopithecus	Cephus	85-4	32	9.3	3.57	155.1	549.51	427.04	126.236	0.250023	22.5737	64.445
Cercopithecus	Cephus	85-4	33	7.28	3.48	120.04	555.73	442.03	111.176	0.219976	28.5563	29.385
Cercopithecus	Cephus	85-4	34	8.07	2.64	151.31	564.59	426.86	126.244	0.249419	19.0951	60.655
Cercopithecus	Cephus	85-4	35	8.94	3.72	104.08	571.35	434.45	118.577	0.234015	24.5891	13.425
Cercopithecus	Cephus	85-4	36	7.04	3.63	115.43	563.6	391.51	161.603	0.319308	31.0392	24.775
Cercopithecus	Cephus	85-4	37	8.94	3.17	132.47	584.6	404.97	147.904	0.291243	20.7681	41.815
Cercopithecus	Cephus	85-4	38	14.84	3.04	123.92	599.29	398.08	154.625	0.303744	11.8208	33.265
Cercopithecus	Cephus	85-4	39	9.82	3.39	120.72	597.27	384.4	168.328	0.330761	20.1949	30.065
Cercopithecus	Cephus	85-4	40	7.25	2.77	141.23	590.23	380.39	172.418	0.339186	22.4619	50.575
Cercopithecus	Cephus	85-4	41	4.99	2.77	141.91	650.55	444.92	107.202	0.208857	33.7183	51.255
Cercopithecus	Cephus	85-4	42	6.87	2.83	112.92	656.48	456.49	95.5654	0.18601	24.3265	22.265
Cercopithecus	Cephus	85-4	43	7.5	3.78	120.25	670.03	436.06	115.839	0.22497	30.265	29.595
Cercopithecus	Cephus	85-4	44	11.42	4.08	96.44	683.16	407.43	144.317	0.279669	20.9325	5.78503
Cercopithecus	Cephus	85-4	45	8.34	3.47	109.35	698.29	406.8	144.774	0.279872	24.5865	18.695
Cercopithecus	Cephus	85-4	46	8.93	3.85	104.28	718.24	379.85	171.494	0.330451	25.5394	13.625
Cercopithecus	Cephus	85-4	47	20.81	3.88	78.89	707.34	344.12	207.347	0.400207	10.7456	-11.765
Cercopithecus	Cephus	85-4	48	22.12	4.67	85.66	689.38	349.49	202.182	0.391371	12.1881	-4.99497
Cercopithecus	Cephus	85-4	49	11.92	4.52	116.31	670.66	330.84	221.045	0.429162	22.2838	25.655
Cercopithecus	Cephus	85-4	50	14.46	4.17	74.05	705.57	371.22	180.269	0.348059	16.7611	-16.605
Cercopithecus	Cephus	85-4	51	10.68	4.17	112.22	644.91	353.12	199.061	0.388109	22.9825	21.565
Cercopithecus	Cephus	85-4	52	9.6	3.31	65.88	634.81	380.53	171.768	0.335462	20.1691	-24.775
Cercopithecus	Cephus	85-4	53	9.74	3.72	93.49	637.81	355.94	196.322	0.383212	22.4533	2.83503
Cercopithecus	Cephus	85-4	54	19.52	3.59	100.01	571.57	342.41	210.609	0.415555	10.5978	9.35503
Cercopithecus	Cephus	85-4	55	11.38	3.38	106.56	579.57	341.49	211.437	0.416642	17.2782	15.905
Cercopithecus	Cephus	85-4	56	17.11	3.51	137.27	588.36	349.45	203.377	0.40019	11.8379	46.615
Cercopithecus	Cephus	85-4	57	7.15	2.22	140.61	591.59	363.23	189.561	0.372816	18.0887	49.955
Cercopithecus	Cephus	85-4	58	13.3	4.23	127.21	616.47	319.17	233.334	0.457009	18.5447	36.555
Cercopithecus	Cephus	85-4	59	15.46	3.93	115.42	607.2	323.43	229.18	0.449555	14.7264	24.765
Cercopithecus	Cephus	85-4	60	7.84	2.38	123.54	621.76	359.85	192.596	0.376923	17.6722	32.885
Cercopithecus	Cephus	85-4	61	17.92	4.55	117.39	569.92	367.26	185.779	0.36668	14.7088	26.735
Cercopithecus	Cephus	85-4	62	24.97	3.76	79.22	583.83	277	275.874	0.543173	8.66058	-11.435
Cercopithecus	Cephus	85-4	63	17.46	5.08	90.1	485.08	343.86	210.147	0.420614	16.9149	-0.554969
Cercopithecus	Cephus	85-4	64	13.73	3.63	72.54	499.59	356.01	197.832	0.39502	15.3304	-18.115
Cercopithecus	Cephus	85-4	65	14.45	3.54	82.7	436.74	364.48	190.081	0.383551	14.1808	-7.95497
Cercopithecus	Cephus	85-4	66	18.06	3.56	75.79	399.6	358.93	196.055	0.398082	11.3686	-14.865
Cercopithecus	Cephus	85-4	67	9.59	2.85	78.74	404.04	358.97	195.965	0.3976	17.2886	-11.915
Cercopithecus	Cephus	85-4	68	14.18	3.05	91.04	386.25	373.8	181.339	0.369044	12.4209	0.385031
Cercopithecus	Cephus	85-4	69	9.29	3.19	107.11	381.32	384.17	171.026	0.348353	20.0829	16.455
Cercopithecus	Cephus	85-4	70	18.62	3.28	70.46	363.74	348.08	207.315	0.423498	10.1459	-20.195
Cercopithecus	Cephus	85-4	71	23.23	4.06	59.31	338.86	350.78	204.899	0.420343	10.0655	-31.345
Cercopithecus	Cephus	85-4	72	36.5	3.51	58.58	337.5	343.93	211.764	0.434521	5.51834	-32.075
Cercopithecus	Cephus	85-4	73	21.07	3.21	68.98	398.08	330.4	224.601	0.456135	8.7631	-21.675
Cercopithecus	Cephus	85-4	74	48.07	3.19	66.38	387.46	283.08	272.039	0.553417	3.80503	-24.275
Cercopithecus	Cephus	85-4	75	12.42	3.68	76.61	418.47	345.87	208.899	0.422803	17.2353	-14.045
Cercopithecus	Cephus	85-4	76	32.18	4.02	70.84	413.22	289.07	265.755	0.538295	7.17627	-19.815
Cercopithecus	Cephus	85-4	77	34.16	5.35	85.73	518.51	291.15	262.472	0.522384	9.01053	-4.92497
Cercopithecus	Cephus	85-4	78	10.49	3.91	106.93	527.67	286.73	266.787	0.530164	21.8844	16.275
Cercopithecus	Cephus	85-4	79	10.73	4.09	101.45	543.41	286.03	267.307	0.529819	22.4064	10.795
Cercopithecus	Cephus	85-4	80	42.1	4.61	72.45	558.82	286.59	266.571	0.527022	6.28656	-18.205
Cercopithecus	Cephus	85-4	81	10.05	4.37	108.57	634.32	278.71	273.587	0.534256	25.7742	17.915
Cercopithecus	Cephus	85-4	82	12.73	5.49	110.94	640.8	282.58	269.643	0.526005	25.5478	20.285
Cercopithecus	Cephus	85-4	83	12.79	4.87	119.45	693.66	289.98	261.64	0.50606	22.3812	28.795
Cercopithecus	Cephus	85-4	84	23.14	4.62	129.03	697	273.39	278.19	0.537767	11.5167	38.375
Cercopithecus	Cephus	85-4	85	22.26	3.9	121.68	707.49	240.55	310.908	0.599966	10.0904	31.025
Cercopithecus	Cephus	85-4	86	16.76	4.24	113.53	719.72	267.26	284.06	0.54711	14.6541	22.875
Cercopithecus	Cephus	85-4	87	12.13	4.9	117.95	727.27	261.28	289.953	0.55778	23.8258	27.295
Cercopithecus	Cephus	85-4	88	16.56	3.22	111.01	744.58	264.61	286.426	0.549476	11.2123	20.355
Cercopithecus	Cephus	85-4	89	34	3.47	99.32	760.75	260.24	290.611	0.556066	5.85774	8.66503
Cercopithecus	Cephus	85-4	90	16.45	4.1	91.93	771.52	216.39	334.335	0.638584	14.4326	1.27503
Cercopithecus	Cephus	85-4	91	9.3	2.43	112.72	753.94	220.43	330.496	0.633024	15.1466	22.065
Cercopithecus	Cephus	85-4	92	14.85	3.71	115	745.6	213.64	337.381	0.647063	14.4676	24.345
Cercopithecus	Cephus	85-4	93	11.07	3.44	120.63	729.8	217.38	333.822	0.641858	18.1044	29.975
Cercopithecus	Cephus	85-4	94	14.88	3.97	114.38	720.86	218.26	333.044	0.64128	15.474	23.725
Cercopithecus	Cephus	85-4	95	25.35	4.49	111.5	702.76	221.63	329.881	0.63704	10.2021	20.845
Cercopithecus	Cephus	85-4	96	14.13	4.13	123.48	718.66	203.5	347.828	0.669965	16.9949	32.825
Cercopithecus	Cephus	85-4	97	35.47	4.44	83.36	651.65	205.16	346.934	0.675494	7.19093	-7.29497
Cercopithecus	Cephus	85-4	98	32.65	4.23	88.25	669.51	185.16	366.729	0.71195	7.44393	-2.40497
Cercopithecus	Cephus	85-4	99	83.43	6.51	94.38	652.46	145.37	406.711	0.79169	4.47531	3.72503
Cercopithecus	Cephus	85-4	100	48.41	4.33	89.41	619.79	147.67	404.785	0.792132	5.13164	-1.24497
Cercopithecus	Cephus	85-4	101	25.22	4.57	89.17	575.63	170.92	382.041	0.753067	10.44	-1.48497
Cercopithecus	Cephus	85-4	102	25.98	4	93.77	570.21	187.8	365.224	0.720581	8.85675	3.11503
Cercopithecus	Cephus	85-4	103	45.14	4.05	77.82	534.38	201.61	351.824	0.698266	5.14755	-12.835
Cercopithecus	Cephus	85-4	104	23.82	3.61	72.71	496.23	207.21	346.661	0.692384	8.71695	-17.945
Cercopithecus	Cephus	85-4	105	33.95	3.33	76.27	470.16	213.72	340.449	0.682942	5.62893	-14.385
Cercopithecus	Cephus	85-4	106	23.95	4.57	73.71	470.4	189.6	364.565	0.731255	11.0003	-16.945
Cercopithecus	Cephus	85-4	107	32.81	3.83	82.31	449.06	154.57	399.837	0.804815	6.70357	-8.34497
Cercopithecus	Cephus	85-4	108	35.92	4.38	79.51	511.91	165.11	388.579	0.774029	7.00394	-11.145
Cercopithecus	Cephus	85-4	109	26.04	4.13	79.13	520.33	169.13	384.463	0.76477	9.12577	-11.525
Cercopithecus	Cephus	85-4	110	19.82	4.3	82.3	531.5	161.41	392.055	0.778422	12.5301	-8.35497
Cercopithecus	Cephus	85-4	111	16.31	3.34	79.85	448.55	94.66	459.749	0.925382	11.8168	-10.805
Cercopithecus	Cephus	85-4	112	11.3	3.86	77.96	459.27	83.5	470.785	0.945879	19.974	-12.695
Cercopithecus	Cephus	85-4	113	12.76	4.11	78.37	483.77	107.91	446.097	0.892665	18.79	-12.285
Cercopithecus	Cephus	85-4	114	6.76	3.01	70.82	493.96	91.92	461.969	0.922834	26.4404	-19.835
Cercopithecus	Cephus	85-4	115	7.58	4.89	81.88	498.78	83.68	470.154	0.938418	40.1746	-8.77497
Cercopithecus	Cephus	85-4	116	12.59	4.87	83.75	518.27	131.04	422.574	0.840806	22.7565	-6.90497
Cercopithecus	Cephus	85-4	117	8.61	4.58	82.6	513.37	78.17	475.497	0.94678	32.1366	-8.05497
Cercopithecus	Cephus	85-4	118	44.05	4.26	98.54	702.52	91.19	460.315	0.888745	5.54965	7.88503
Cercopithecus	Cephus	85-4	119	38.2	4.91	101.04	703.8	123.87	427.623	0.825505	7.38489	10.385
Cercopithecus	Cephus	85-4	120	83.01	5.53	98.1	771.07	103.64	447.082	0.853821	3.81979	7.44503
