# Supplementary material for: How mangabey molar form differs under routine vs. fallback hard-object feeding regimes
Source: PeerJ journal article supplement (doi:10.7717/peerj.16534), 2023-12-11
Supplement: Figure_S4.pub.pdf [file Figure_S4.pub.pdf]

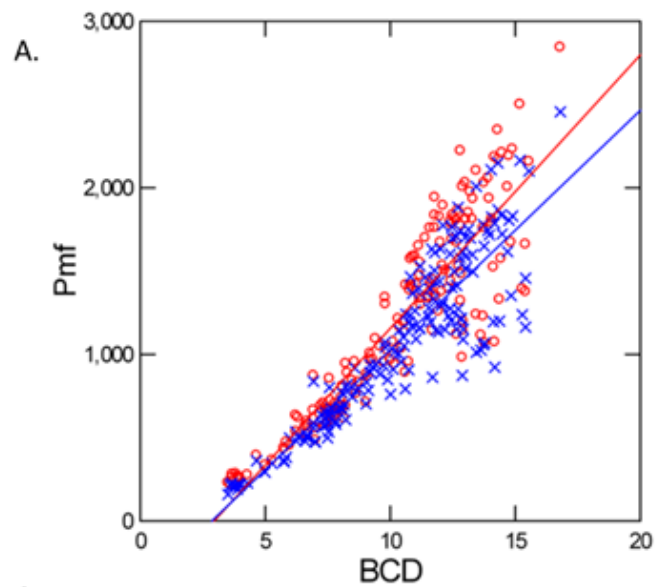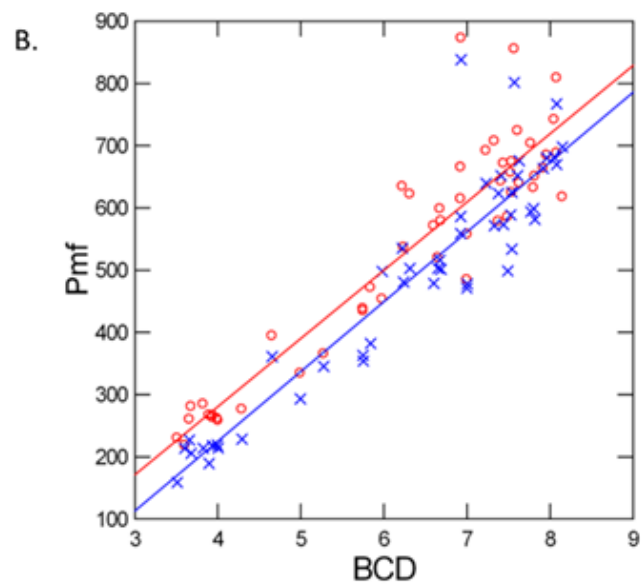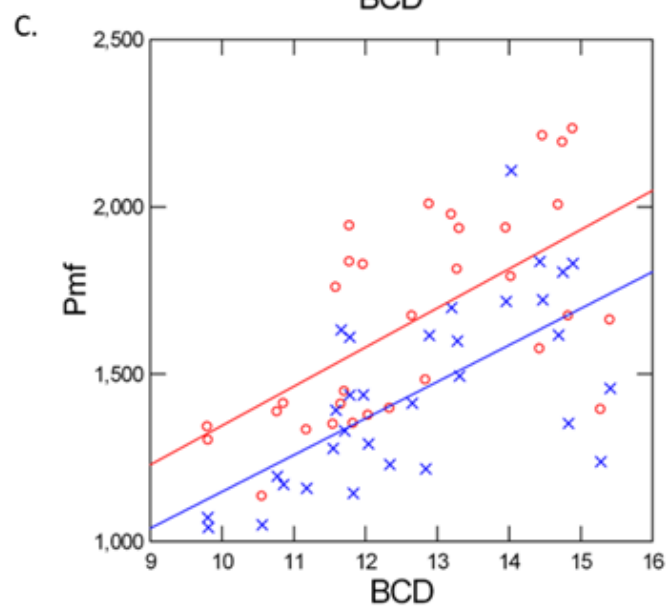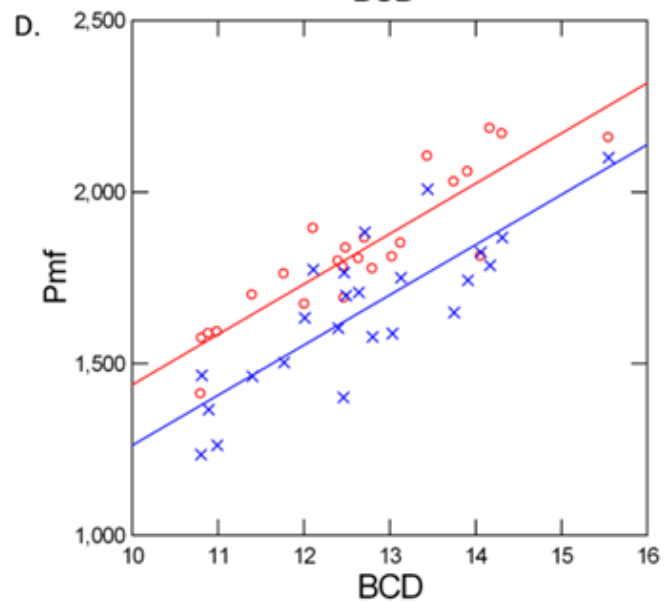

○ PMF\_PROTOCONID  
× PMF\_METACONID
